# Supplementary material
Source: HighWire-hosted journal article supplement (https://tech.snmjournals.org/highwire/filestream/8660/field_highwire_adjunct_files/1/185777_Figure_7B_color.pdf)

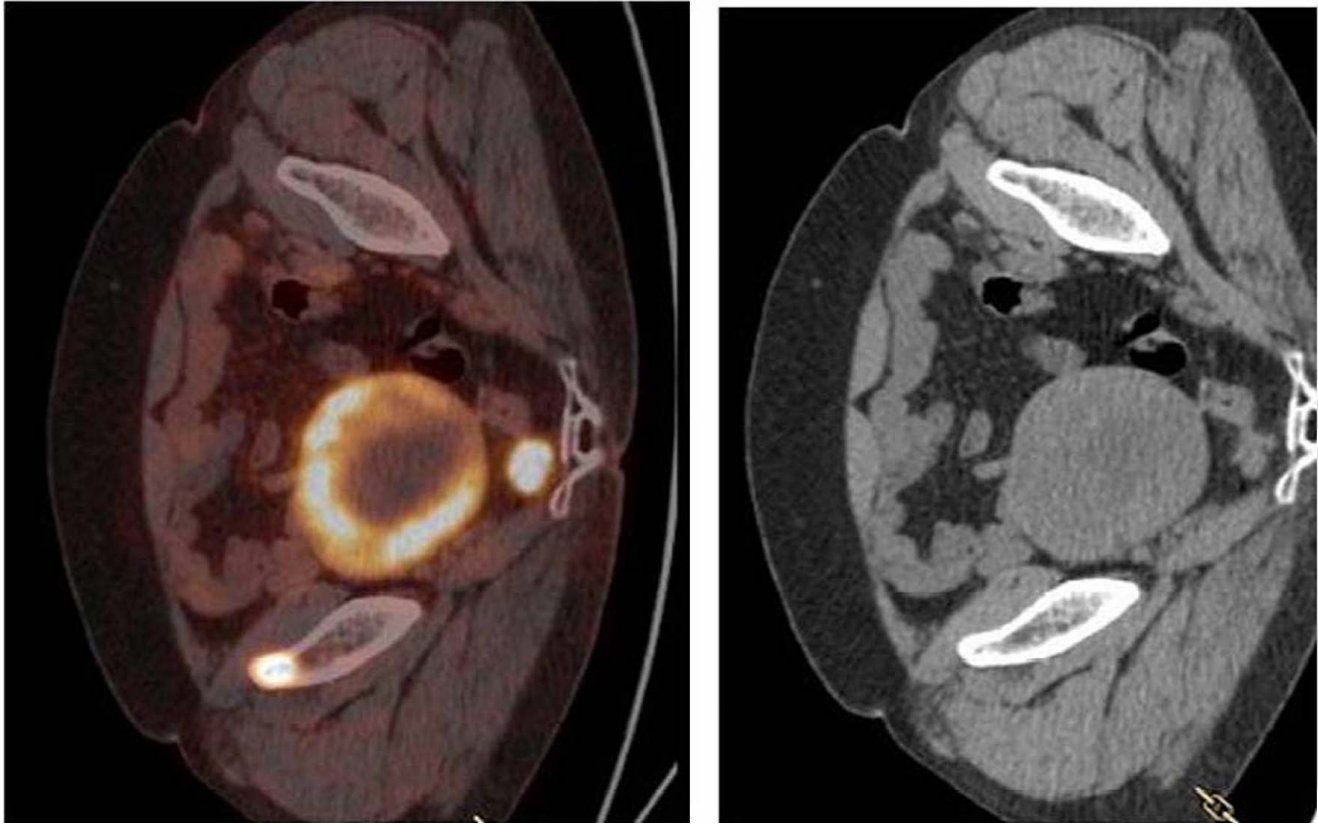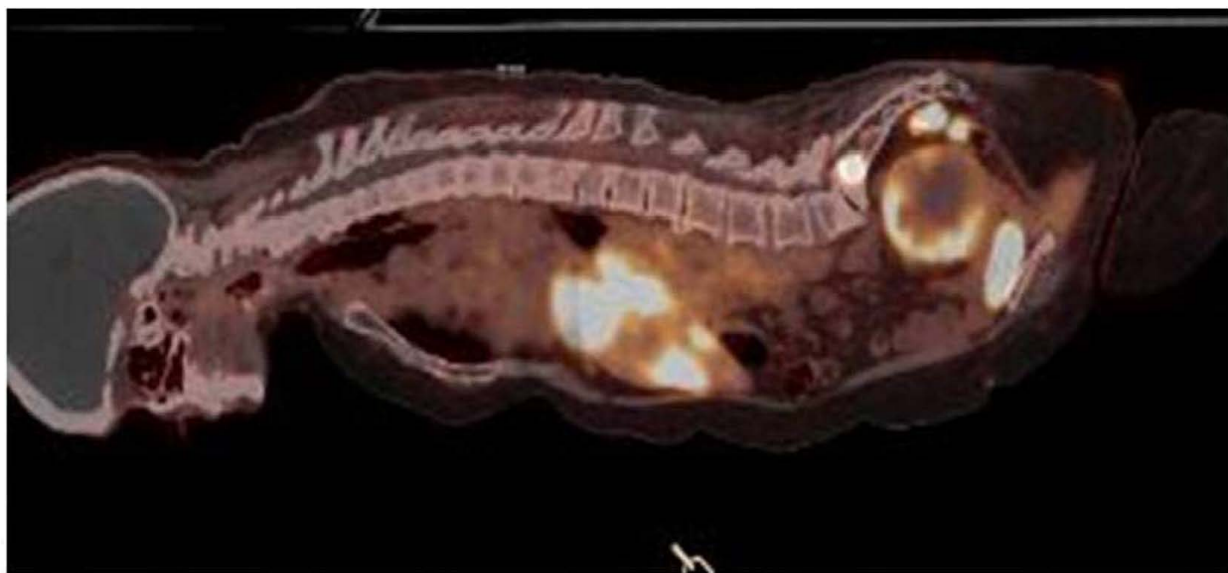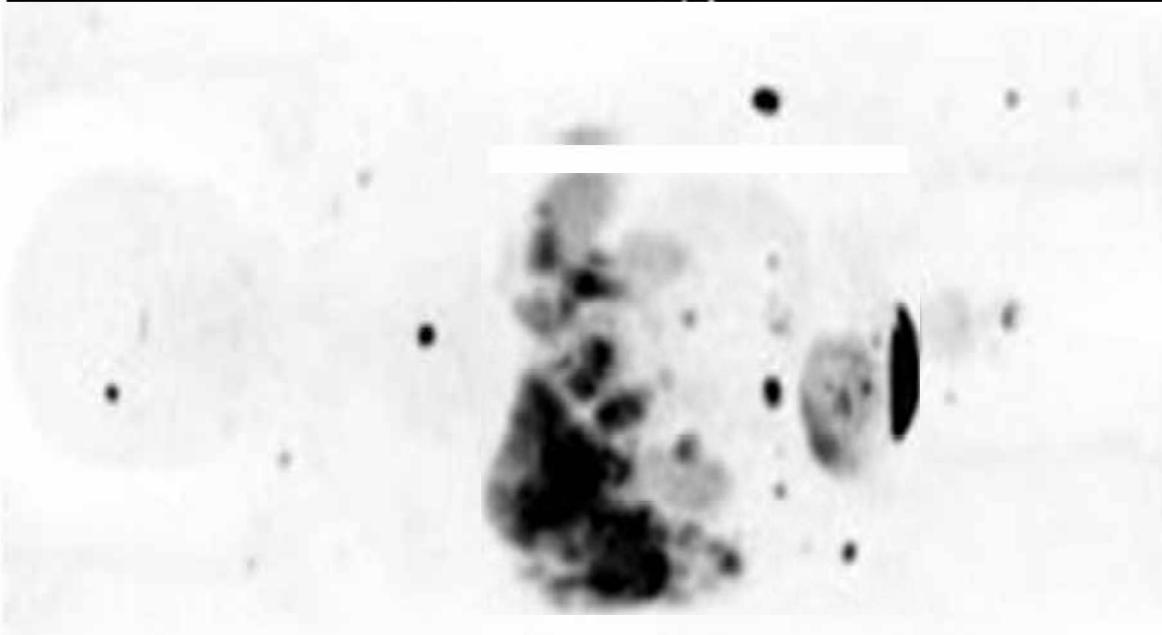

Supplement: 185777_Figure_7B_color.pdf [file 185777_Figure_7B_color.pdf]
